# Supplementary material
Source: publisher site journal article supplement (https://cdn.jamanetwork.com/ama/content_public/journal/jamanetworkopen/938042/zoi190248supp2_prod.pdf)
Supplement: Supplementary file [file zoi190248supp2_prod.pdf]

## Supplementary Online Content

Knight JR, Sherritt L, Gibson EB, et al. Effect of computer-based substance use screening and brief behavioral counseling vs usual care for youths in pediatric primary care: a pilot randomized clinical trial. *JAMA Netw Open*. 2019;2(6):e196258. doi:10.1001/jamanetworkopen.2019.6258

**eTable 1.** Baseline Characteristics of Overall Group and by Study Arm Among Youths Reporting No Use of Alcohol or Other Drugs in the Past 12 Months at Baseline

**eTable 2.** Youths' Reports of Clinician Counseling and Ratings of Their Visit Among Those With No Reported Use of Alcohol or Other Drugs in the Past 12 Months at Baseline

**eFigure.** Kaplan-Meier Survival Curves for Time to First Use During Follow-Up Among Participants Who Reported No Use of Alcohol or Other Drugs in the Past 12 Months at Baseline

This supplementary material has been provided by the authors to give readers additional information about their work.

**eTable 1. Baseline Characteristics of Overall Group and by Study Arm Among Youths Reporting No Use of Alcohol or Other Drugs in the Past 12 Months at Baseline**

| Baseline characteristic                              | ALL<br>( <i>N</i> = 658 <sup>a</sup> )<br>n (%) | cSBI<br>( <i>n</i> = 478 <sup>a</sup> )<br>n (%) | UC<br>( <i>n</i> = 180 <sup>a</sup> )<br>n (%) | Test<br>statistic <sup>b</sup> | p-value |
|------------------------------------------------------|-------------------------------------------------|--------------------------------------------------|------------------------------------------------|--------------------------------|---------|
| Age in years (mean ±SD)                              | 14.3 ± 1.8                                      | 14.1 ± 1.8                                       | 14.5 ± 1.7                                     | 2.63                           | p<.01   |
| 9 <sup>th</sup> -12 <sup>th</sup> graders            | 296 (49.1)                                      | 197 (41.2)                                       | 100<br>(55.2)                                  | .13                            | p<.01   |
| Girls                                                | 326 (49.6)                                      | 236 (49.4)                                       | 91 (50.3)                                      | .00                            | p=.84   |
| Race/Hispanic ethnicity                              |                                                 |                                                  |                                                | .04                            | p=.60   |
| White non-Hispanic                                   | 282 (42.9)                                      | 203 (42.5)                                       | 79 (43.9)                                      |                                |         |
| Hispanic                                             | 201 (30.5)                                      | 143 (29.9)                                       | 58 (32.2)                                      |                                |         |
| Other/Multi-race                                     | 175 (26.6)                                      | 132 (27.6)                                       | 43 (23.9)                                      |                                |         |
| Two parents at home                                  | 523 (80.0)                                      | 380 (79.6)                                       | 143 (79.4)                                     | .01                            | p=.84   |
| College-graduate parent(s)                           | 414 (71.5)                                      | 306 (72.2)                                       | 108 (69.7)                                     | .02                            | p=.56   |
| Saw pediatrician at visit                            | 564 (85.7)                                      | 412 (86.2)                                       | 152 (84.4)                                     | .02                            | p=.57   |
| Saw a female clinician                               | 438 (66.6)                                      | 321 (67.2)                                       | 117 (65.0)                                     | .02                            | p=.60   |
| Had ≥6 prior visits with clinician                   | 390 (59.6)                                      | 284 (59.8)                                       | 106 (59.2)                                     | .00                            | p=.89   |
| Rode with driver who had been using alcohol or drugs | 43 (6.5)                                        | 29 (6.1)                                         | 14 (7.7)                                       | .03                            | p=.44   |
| Hangs out with any friends that use alcohol or drugs | 251 (38.1)                                      | 169 (35.4)                                       | 82 (45.3)                                      | .09                            | p=.02   |
| Substance-involved siblings <sup>c</sup>             | 50 (8.9)                                        | 40 (9.7)                                         | 10 (6.6)                                       | .05                            | p=.25   |
| Substance-involved parents <sup>c</sup>              | 35 (5.3)                                        | 27 (5.7)                                         | 8 (4.4)                                        | .03                            | p=.53   |

Abbreviations: UC = cSBI = computer-facilitated Screening and Brief Intervention; Usual Care group; SD = standard deviation; CRAFFT = mnemonic for Car, Relax, Alone, Forget, Family/Friends, Trouble.

<sup>a</sup> Sample denominators for individual variables do not always equal the total group size due to missing responses; valid percentages are reported.

<sup>b</sup> Test statistics for continuous variables are from independent samples t-tests (age); for categorical variables, we present the Cramér's V and associated p-value, a measure of strength of association (similar to a correlation coefficient) among categorical variables.

<sup>c</sup> Percent reporting any "agree" response to scale items from the Personal Experience Inventory assessing substance-involvement of siblings or parents.

**eTable 2. Youths' Reports of Clinician Counseling and Ratings of Their Visit Among Those With No Reported Use of Alcohol or Other Drugs in the Past 12 Months at Baseline**

| Baseline post-visit assessment measure                           | Analysis n | cSBI<br>n (%)<br>(n=478 <sup>a</sup> ) | UC<br>n (%)<br>(n=181 <sup>a</sup> ) | ARRR <sup>a,b</sup><br>(95% CI) |
|------------------------------------------------------------------|------------|----------------------------------------|--------------------------------------|---------------------------------|
| Advised about alcohol <sup>c</sup>                               | 654        | 433 (91.0)                             | 126 (70.8)                           | 1.30***<br>(1.17, 1.43)         |
| Advised about cannabis <sup>c</sup>                              | 655        | 430 (90.3)                             | 127 (70.9)                           | 1.30***<br>(1.17, 1.44)         |
| Advised about not riding with impaired driver                    | 654        | 387 (81.5)                             | 79 (44.1)                            | 1.89***<br>(1.59, 2.25)         |
| Advised about not driving after using substances <sup>d</sup>    | 296        | 160 (81.2)                             | 42 (42.4)                            | 1.91***<br>(1.51, 2.39)         |
| Received information on health and safety risks of...            |            |                                        |                                      |                                 |
| Alcohol                                                          | 653        | 407 (85.9)                             | 112 (62.6)                           | 1.38***<br>(1.22, 1.56)         |
| Cannabis                                                         | 654        | 396 (83.4)                             | 103 (57.5)                           | 1.47***<br>(1.28, 1.68)         |
| "Excellent"/ "Very Good" rating of clinician advice <sup>e</sup> | 568        | 348 (79.8)                             | 92 (69.7)                            | 1.13*<br>(1.00, 1.27)           |
| "Very much" likely to follow clinician advice <sup>e</sup>       | 574        | 327 (74.3)                             | 85 (63.4)                            | 1.15*<br>(1.00, 1.31)           |
| "Very much" or "Quite a bit" satisfied with visit                | 653        | 456 (96.0)                             | 169 (94.9)                           | 1.02<br>(0.97, 1.06)            |
| Received Contract for Life <sup>f</sup>                          | 254        | 141 (79.2)                             | 6 (7.9)                              | 11.59***<br>(5.22, 25.74)       |

Abbreviations: cSBI = computer-facilitated Screening and Brief Intervention; UC = Usual Care; ARRR = Adjusted Relative Risk Ratio; CI = Confidence Interval.

\* p<.05, \*\* p < 0.01

<sup>a</sup> Adjusted relative risk ratio with UC as the reference group.

<sup>b</sup> Logistic regression with generalized estimating equations (GEE) adjusted for grade group (middle vs. high school), conducted using SUDAAN® v. 11.0.3 software to account for clinician-sampling design.

<sup>c</sup> The "Advised" variables include advice to *not start* alcohol or cannabis/drug use for adolescents who had no prior use of the substance and advice to *stop* further use for those who had used the substance in the past 12 months.

<sup>d</sup> This question was asked of high school students only; analysis denominator for UC=99, cSBI=197.

<sup>e</sup> Among adolescents reporting receiving advice about alcohol or cannabis/drug use; analysis denominator for UC=132, cSBI=436.

<sup>f</sup> This question was added nine months after starting recruitment so analysis includes only those who received this question; analysis denominator for UC=76, cSBI=178.

**eFigure. Kaplan-Meier Survival Curves for Time to First Use During Follow-Up Among Participants Who Reported No Use of Alcohol or Other Drugs in the Past 12 Months at Baseline**

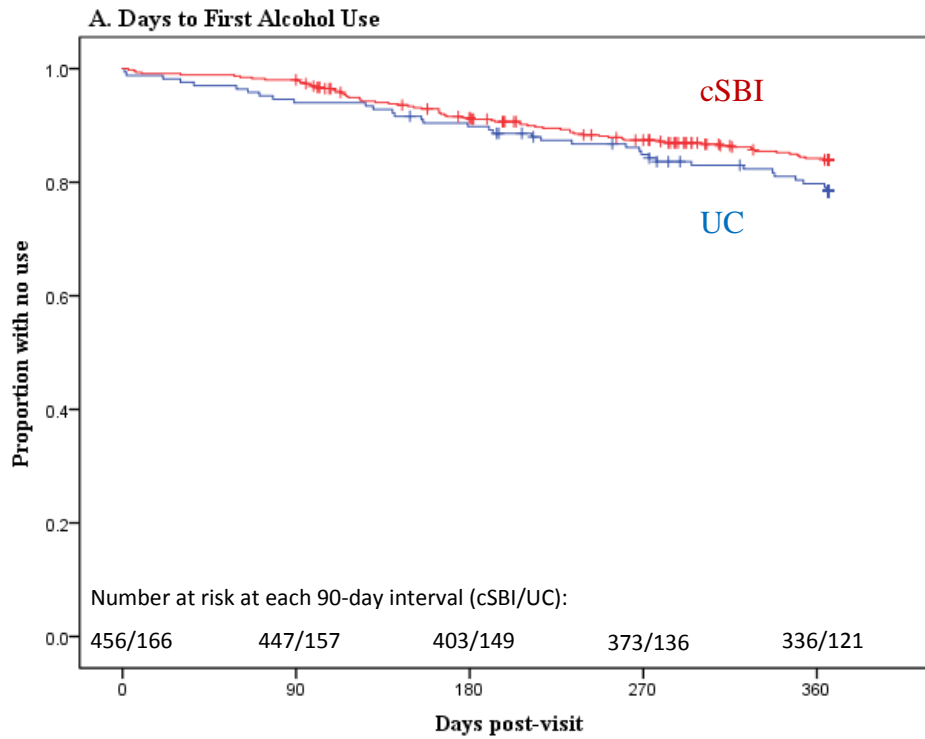

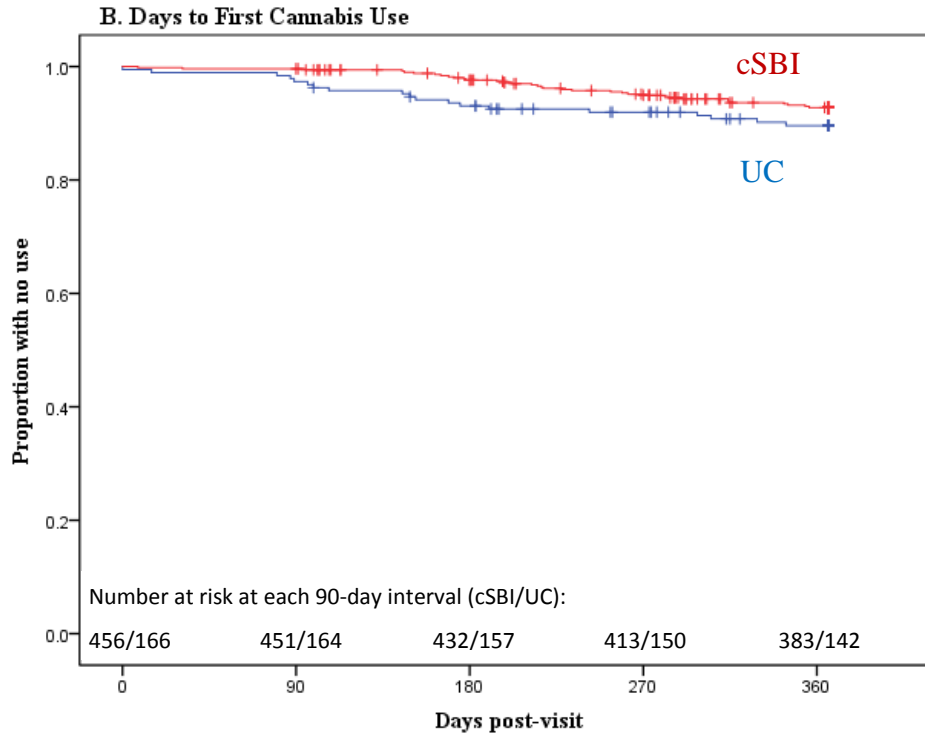

The x-axis displays the number of days during the 12-months follow-up. The red line is the survival curve showing the proportion of adolescents in the computer-facilitated Screening and Brief Intervention (cSBI) group with no use since baseline. The blue line is the curve for those receiving Usual Care (UC). The “+” shows censored observations within each study arm. Above the x-axis, we present the number of adolescents in each arm still at risk for use at each 90-day interval. Medians (interquartile range [IQR]) for number of days to first use by group were the following: for any alcohol use, cSBI= 366 (338-366) and UC=366 (334-366); for cannabis use, cSBI=366 (366-366) and UC=366 (366-366).
